# Supplementary material
Source: publisher site journal article supplement (https://www.dovepress.com/article/427103)
Supplement: Supplementary file 1 [file get_supplementary_file.php]

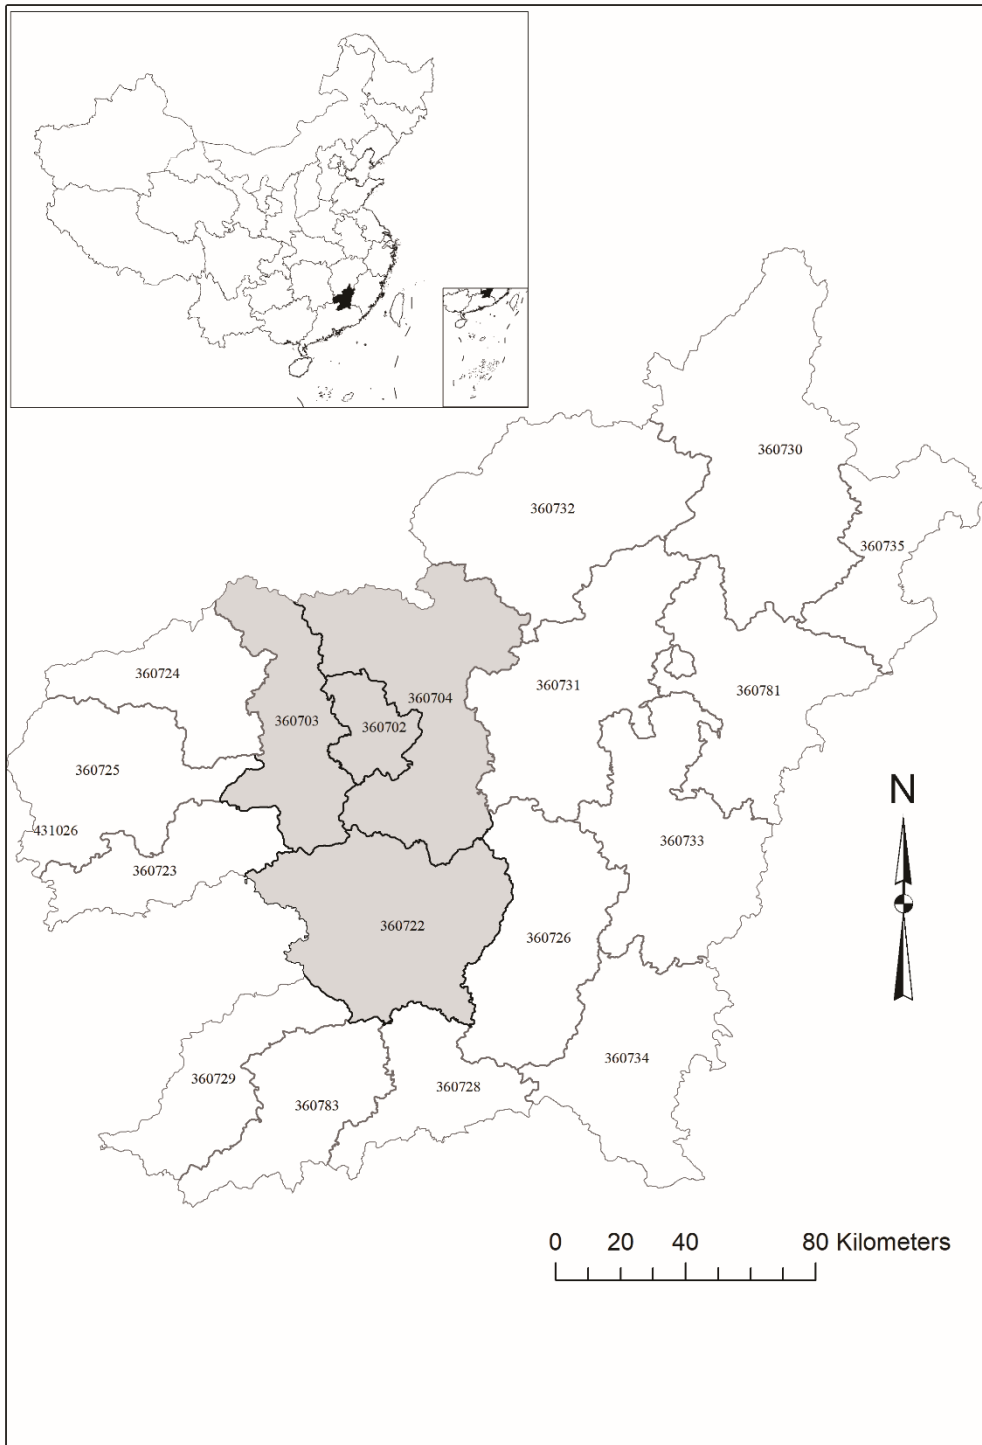

Figure S1 The city of Ganzhou (black) and the four selected districts (gray) in this cross-sectional study

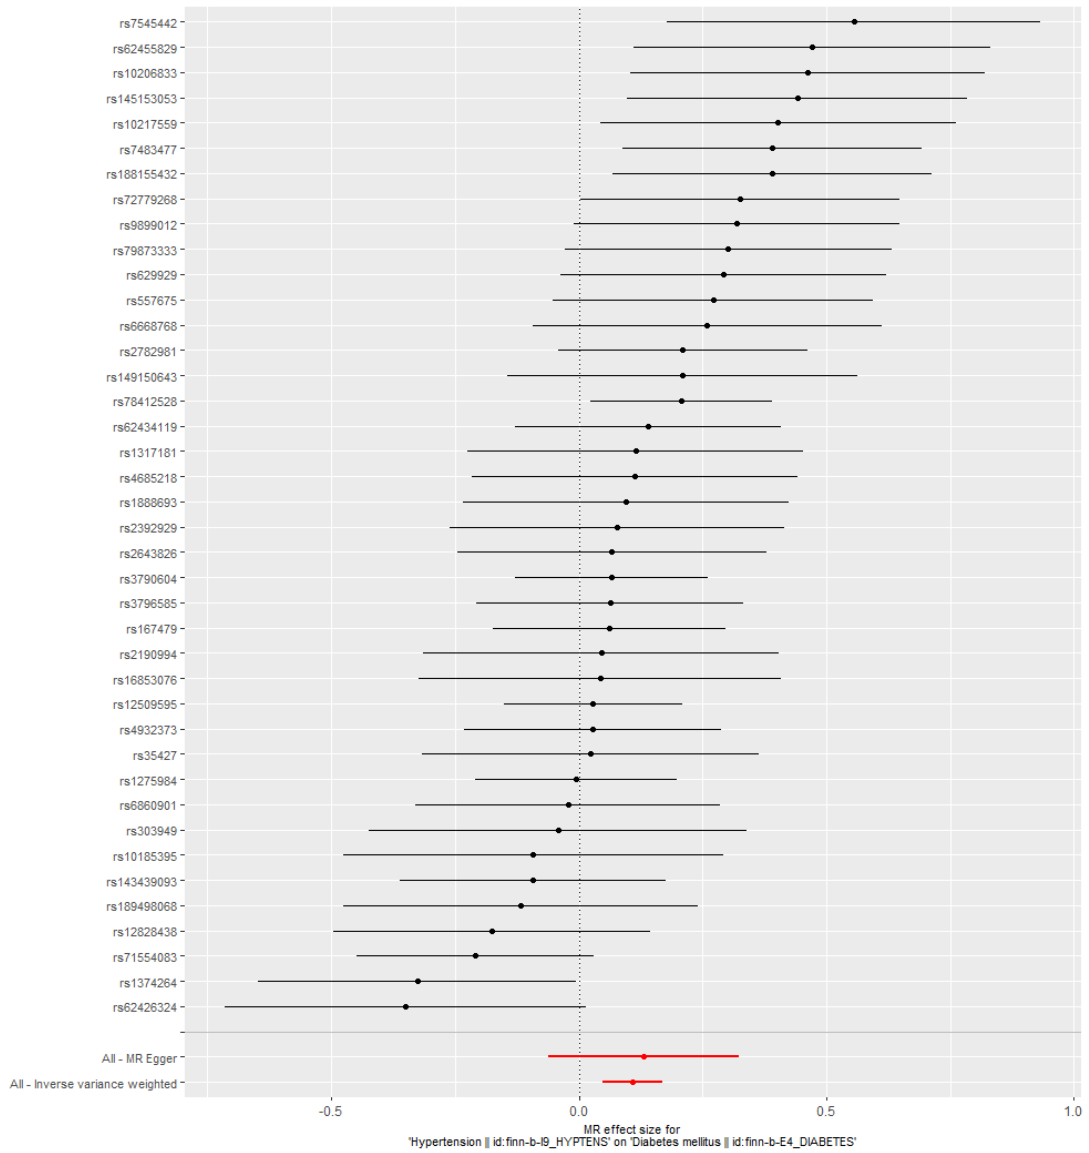

Figure S2A

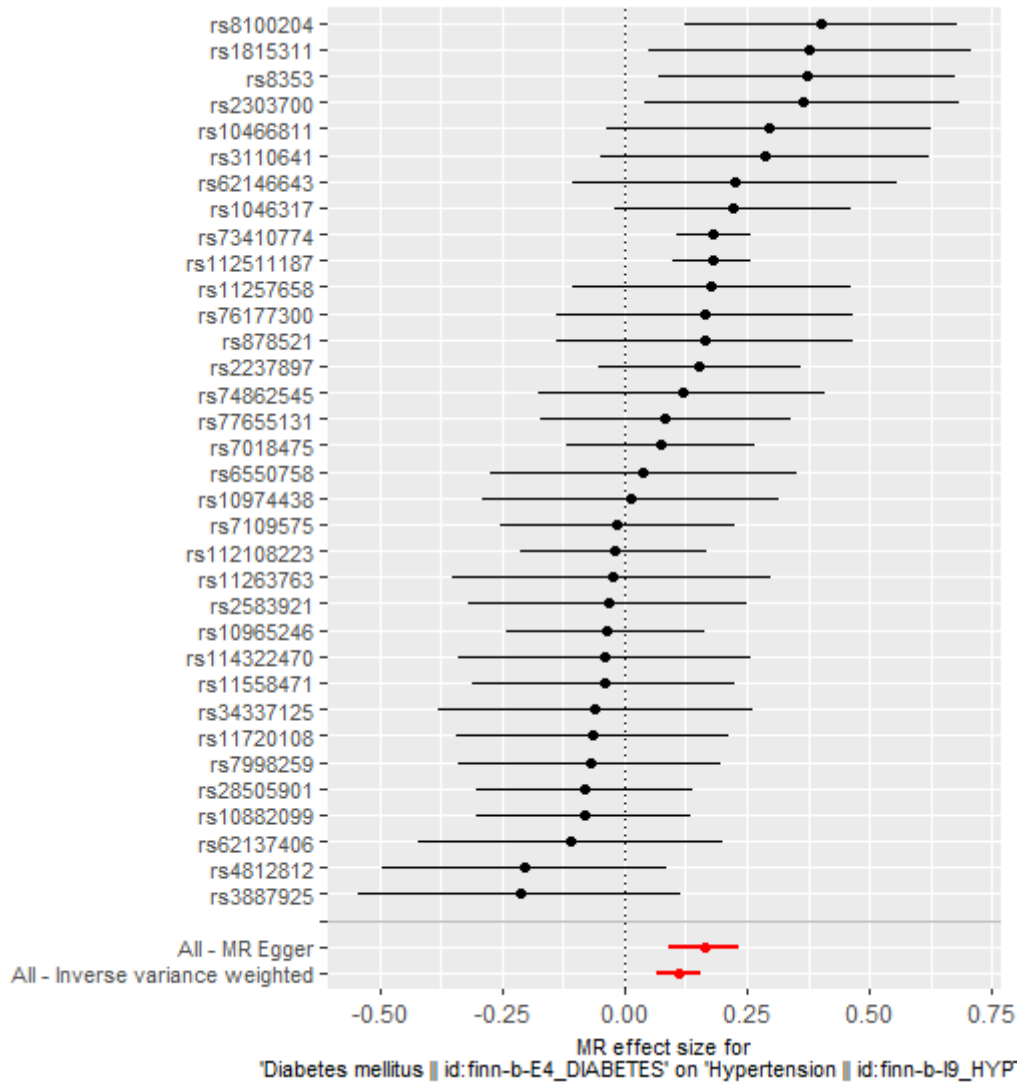

Figure S2B

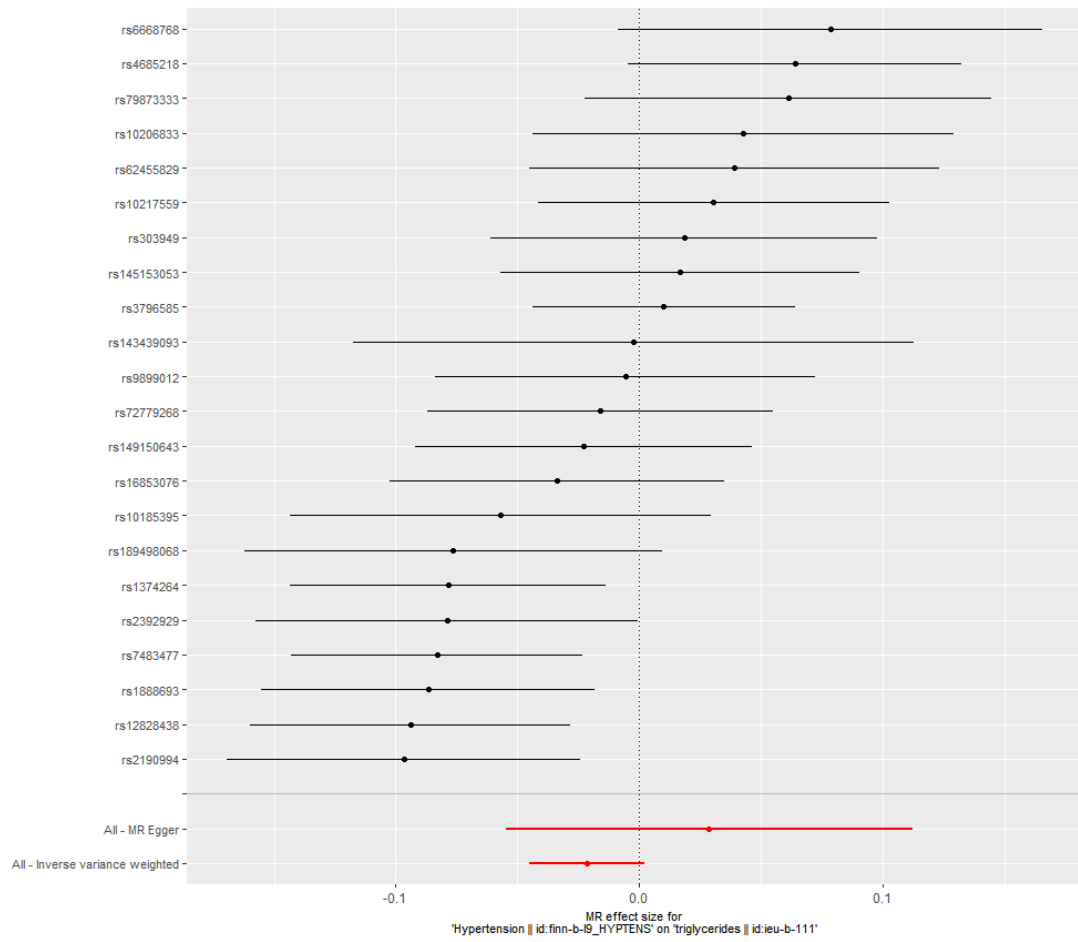

Figure S2C

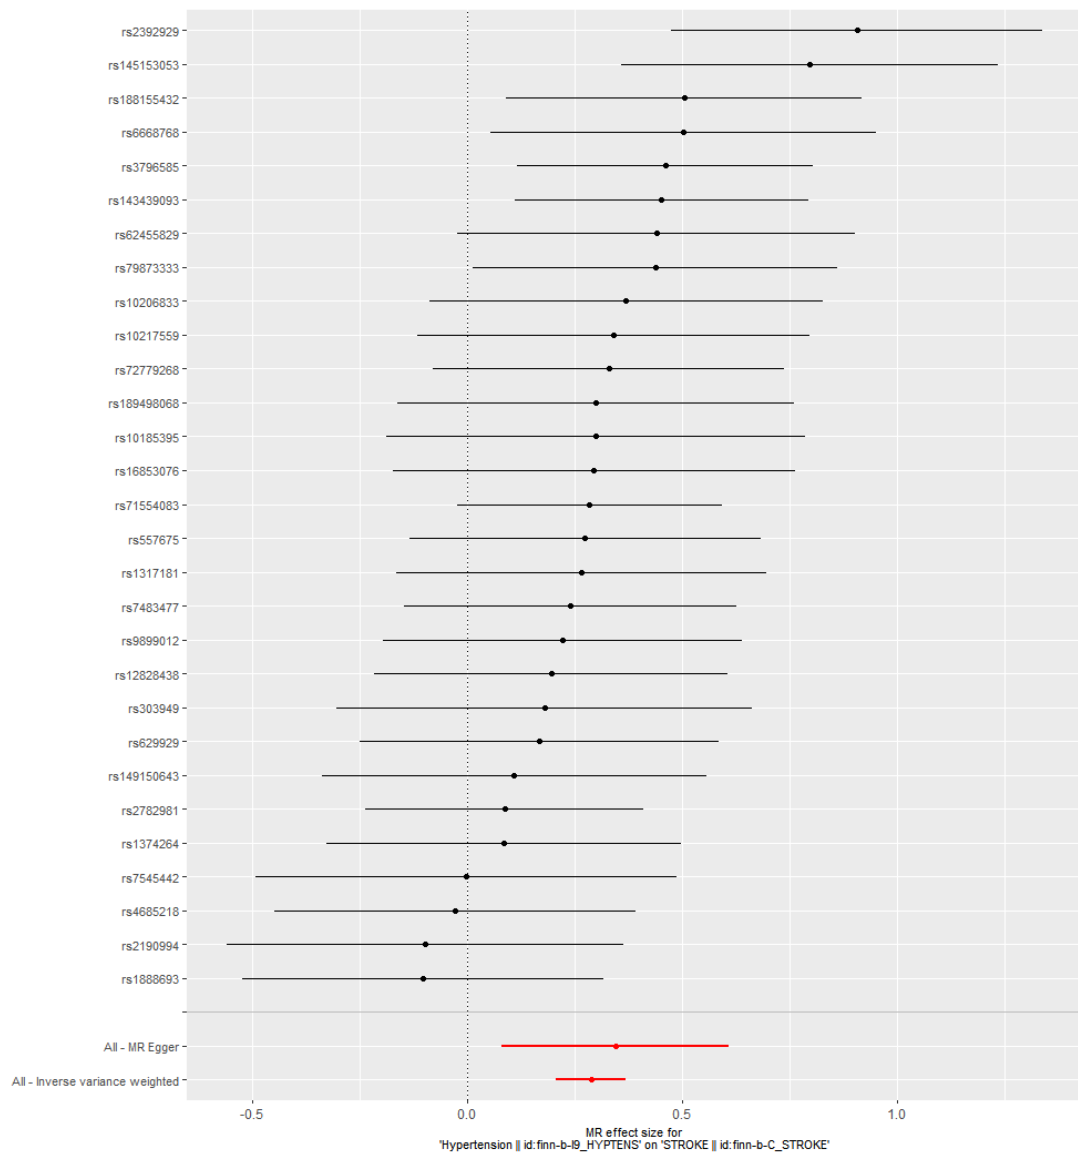

Figure S2D

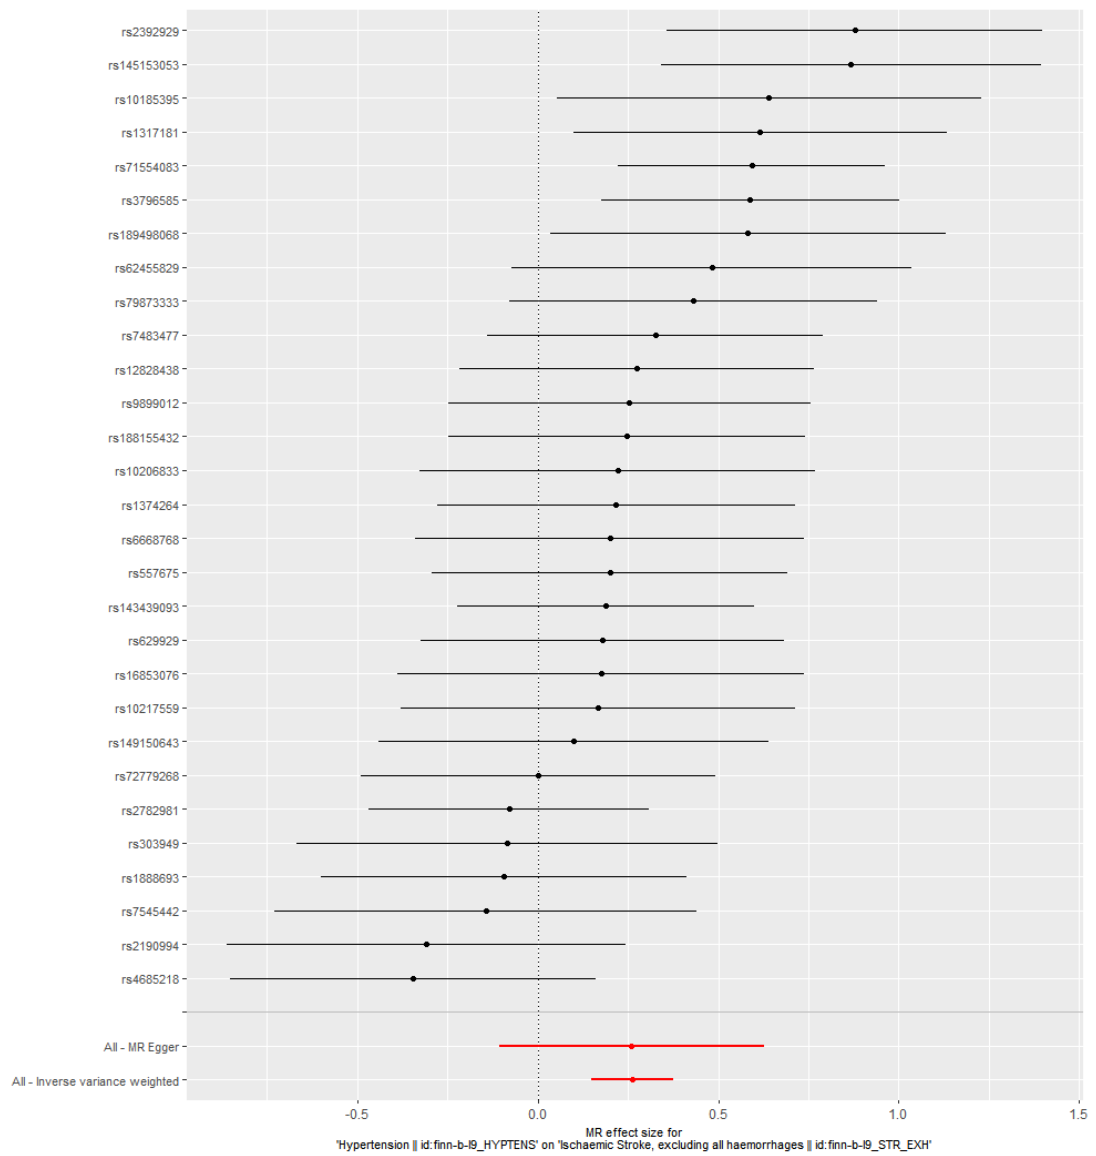

Figure S2E

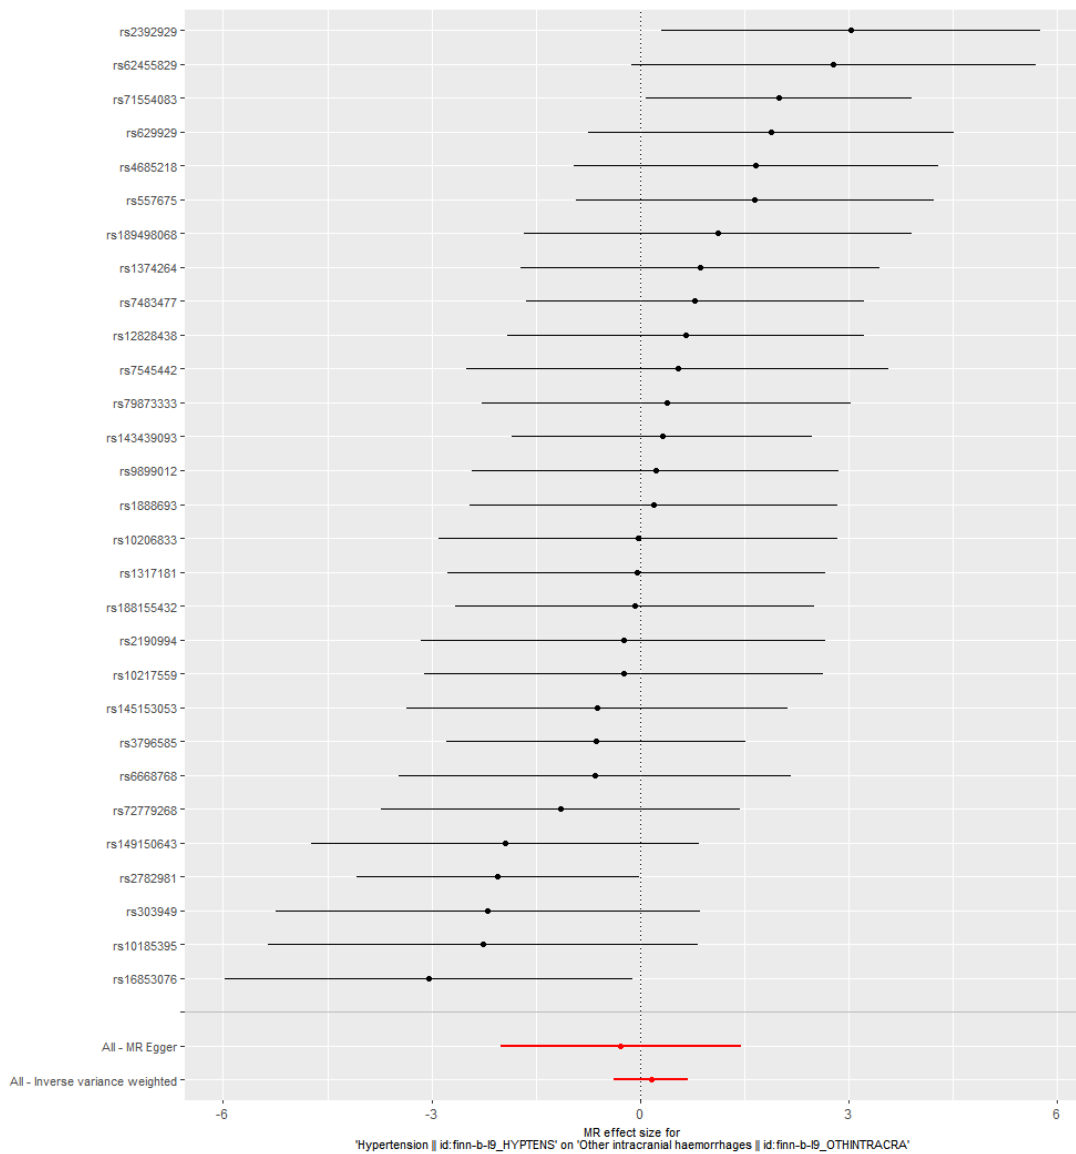

Figure S2F

Figure S2 The effect estimates of single SNPs. A, The effect of hypertension on diabetes; B, The effect of diabetes on hypertension; C, The effect of hypertension on triglycerides; D, The effect of hypertension on stroke; E, The effect of hypertension on ischemic stroke; F, The effect of hypertension on intracranial hemorrhages.

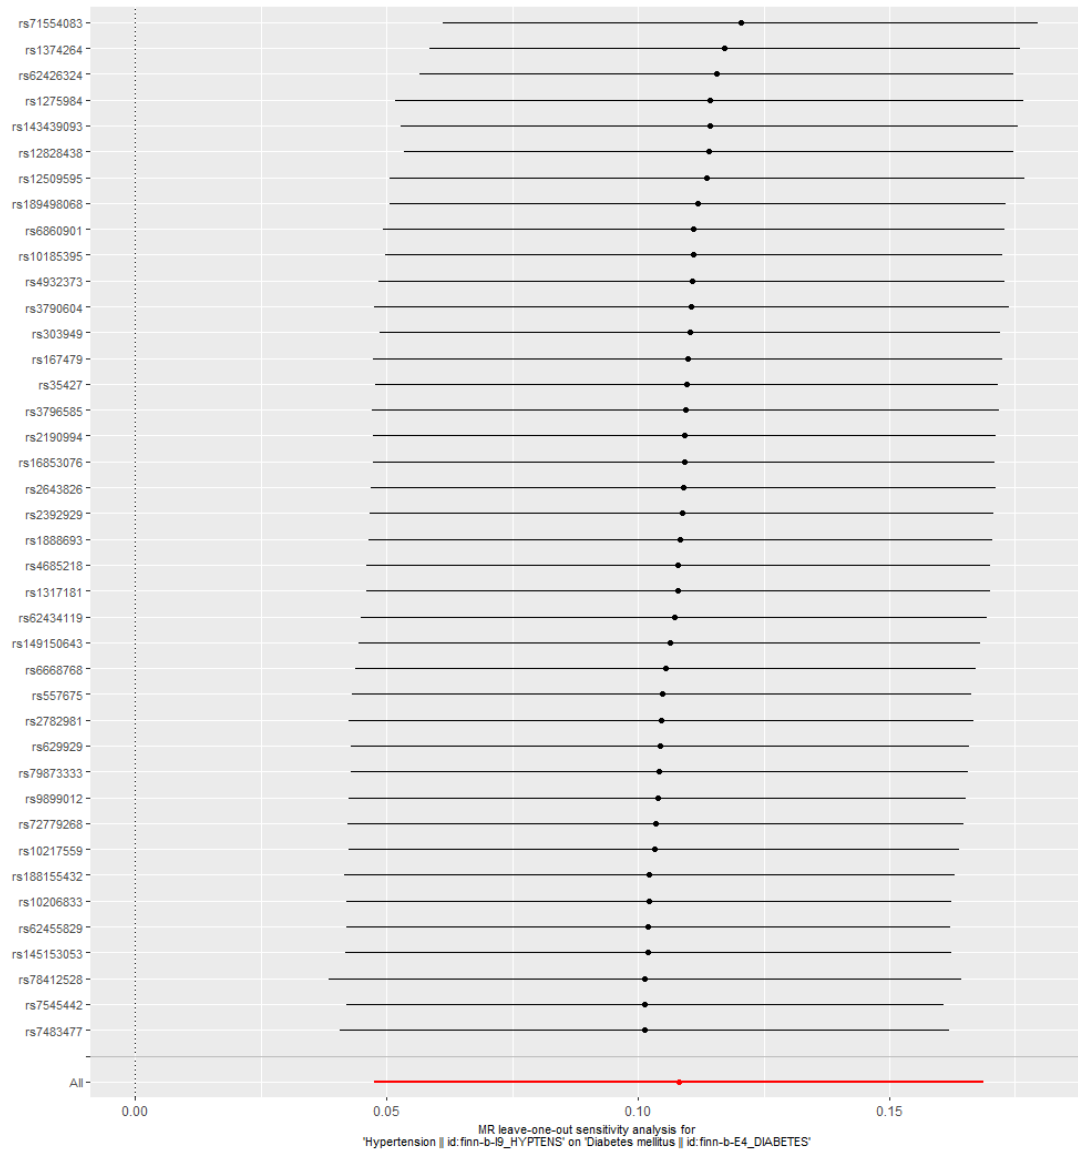

Figure S3A



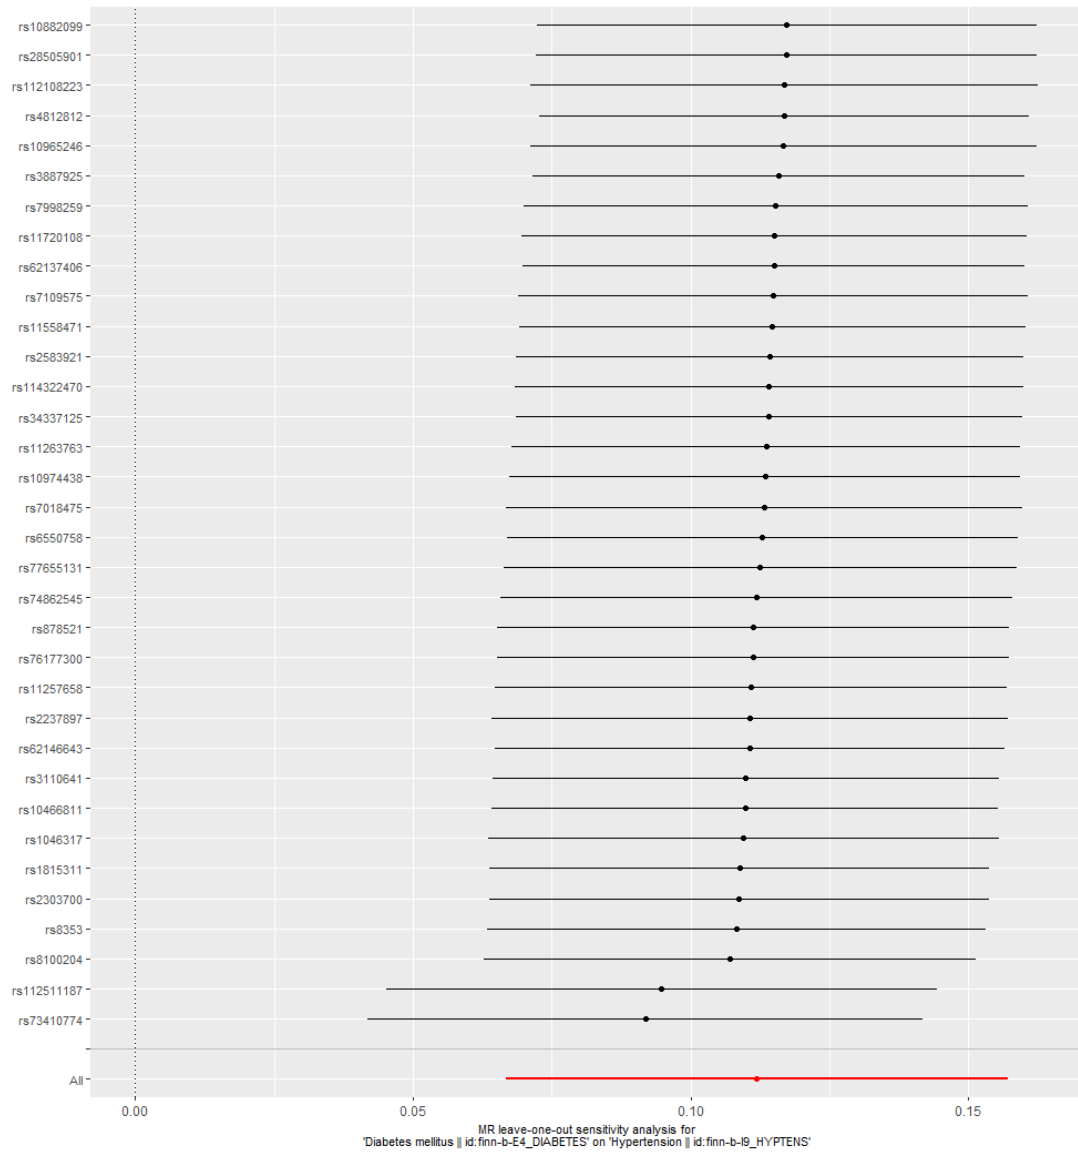

Figure S3B

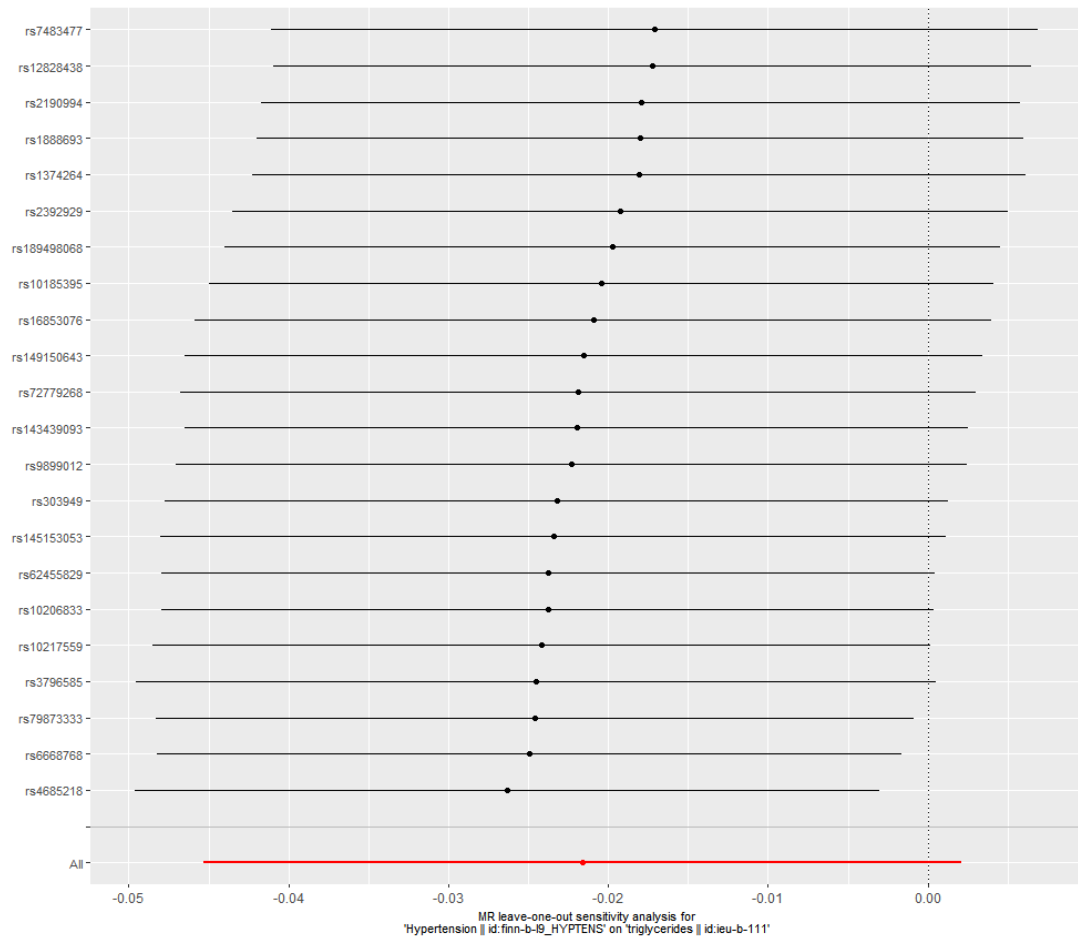

Figure S3C

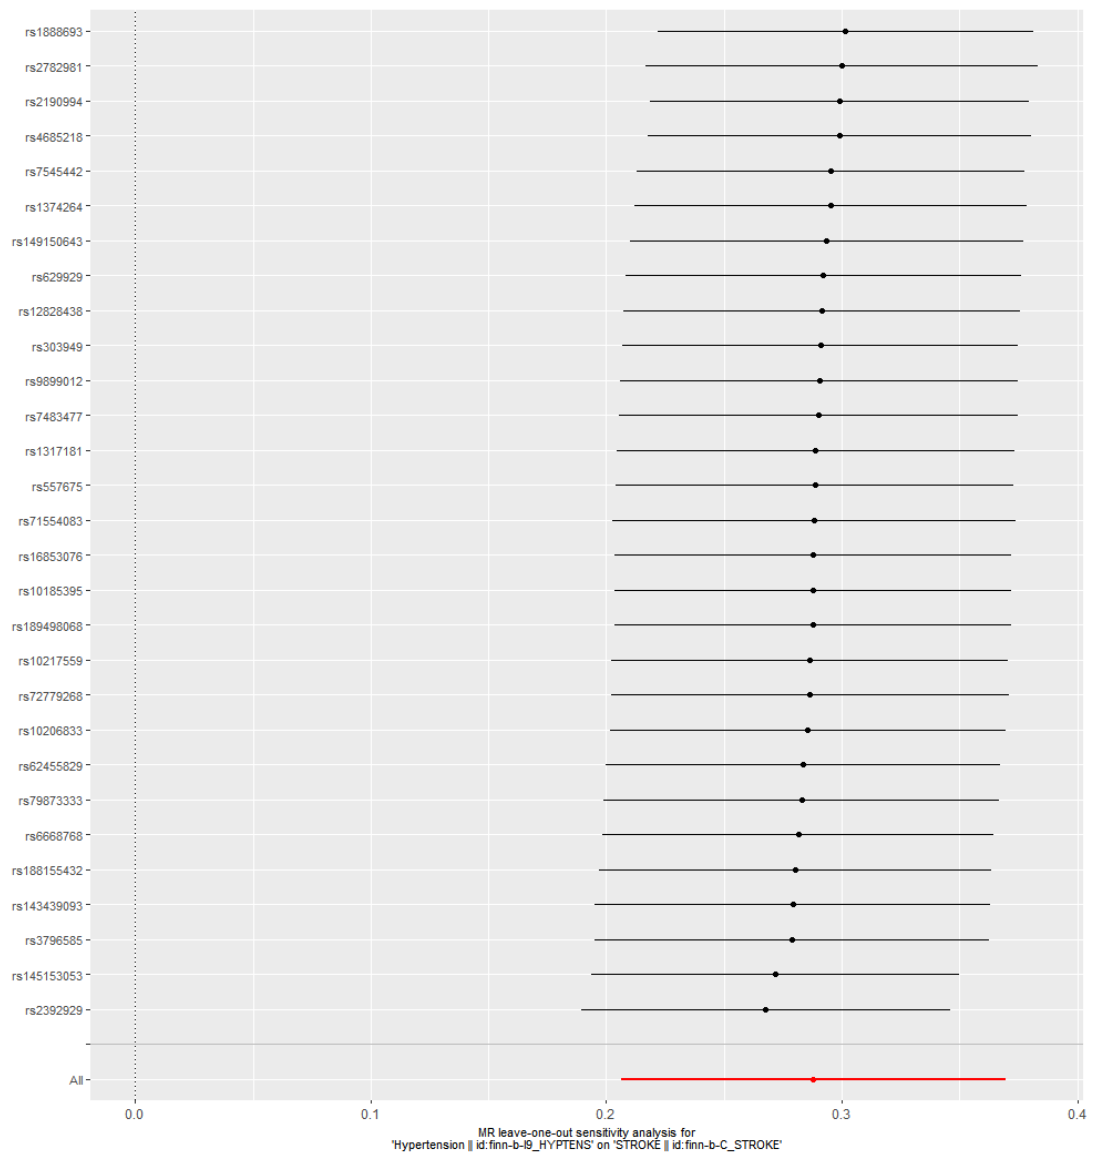

Figure S3D

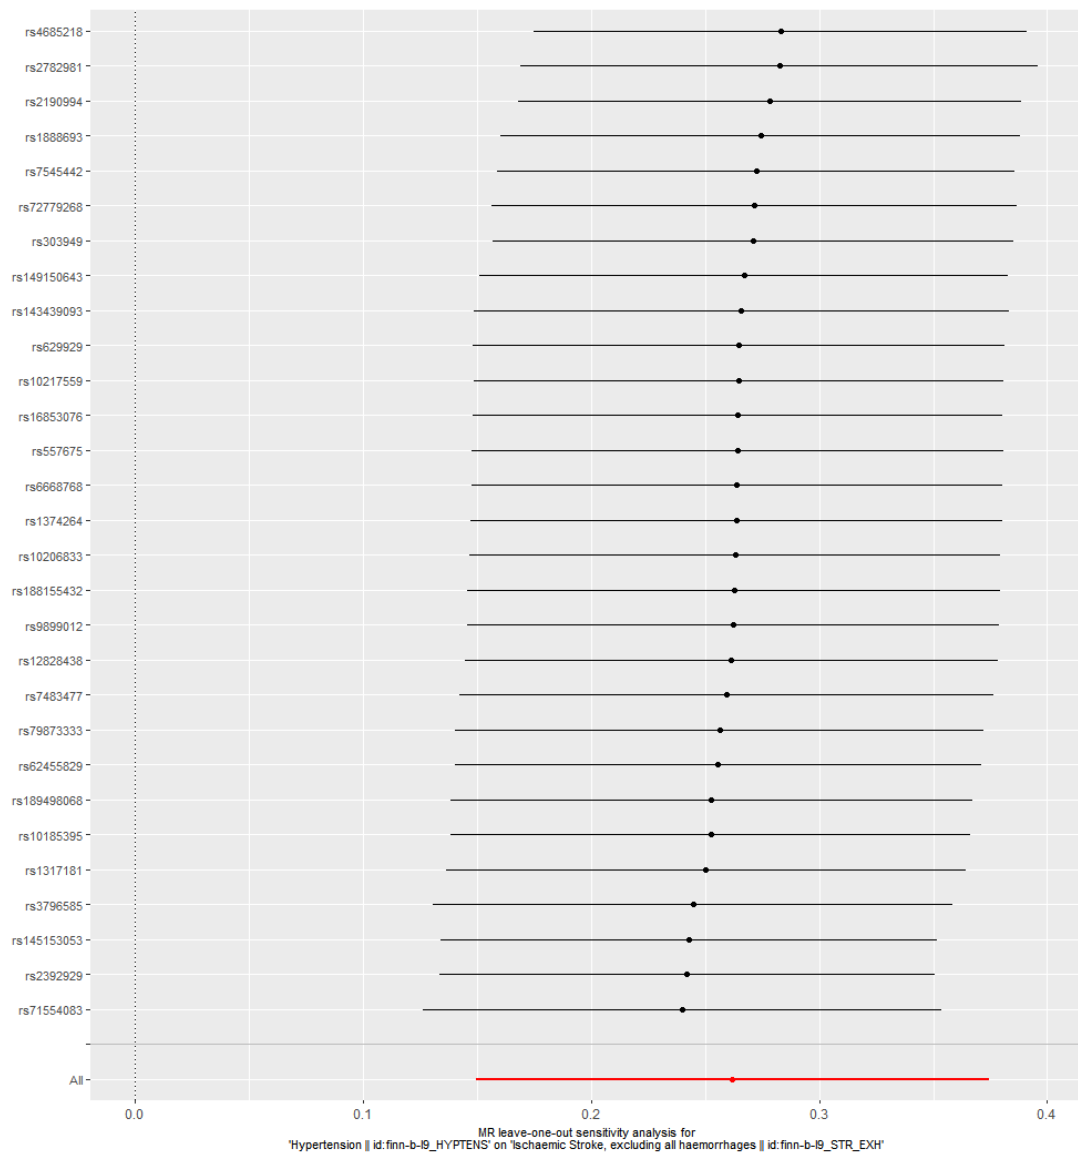

Figure S3E

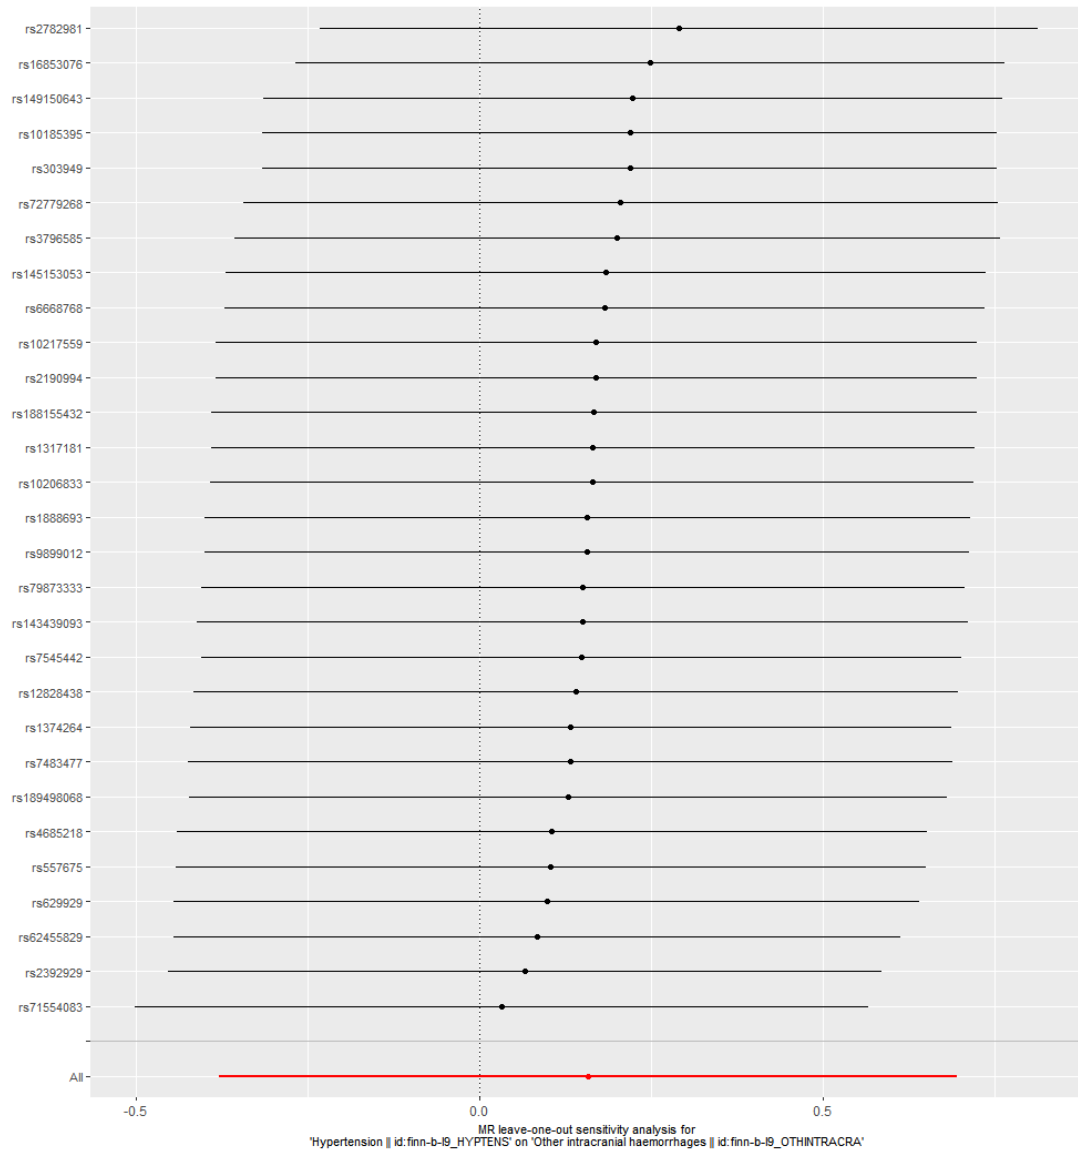

Figure S3F

Figure S3 Results of leave-one-out sensitivity analysis. A, The effect of hypertension on diabetes; B, The effect of diabetes on hypertension; C, The effect of hypertension on triglycerides; D, The effect of hypertension on stroke; E, The effect of hypertension on ischemic stroke; F, The effect of hypertension on intracranial hemorrhages.

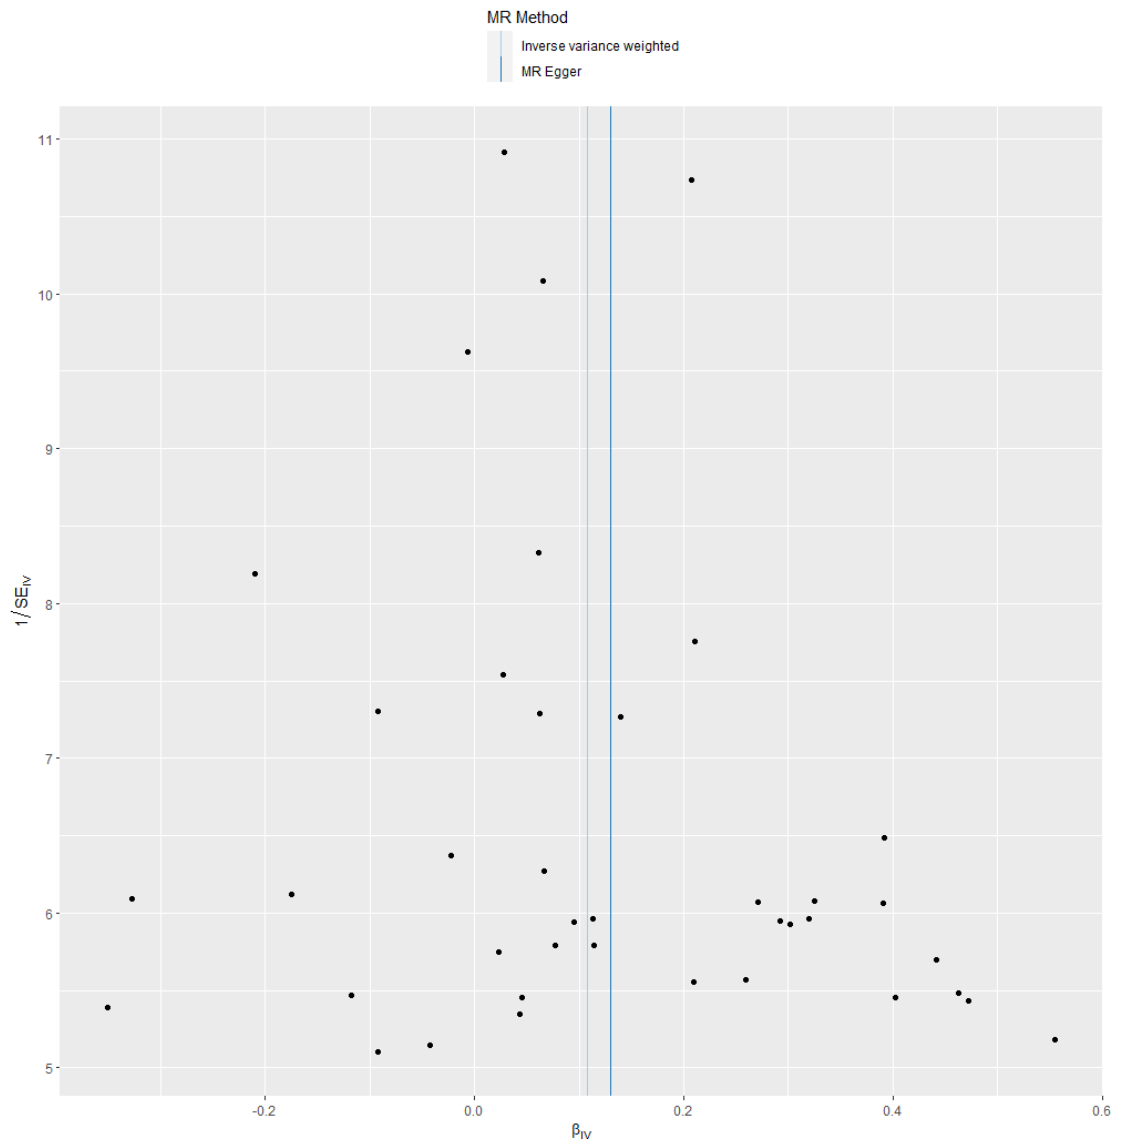

Figure S4A

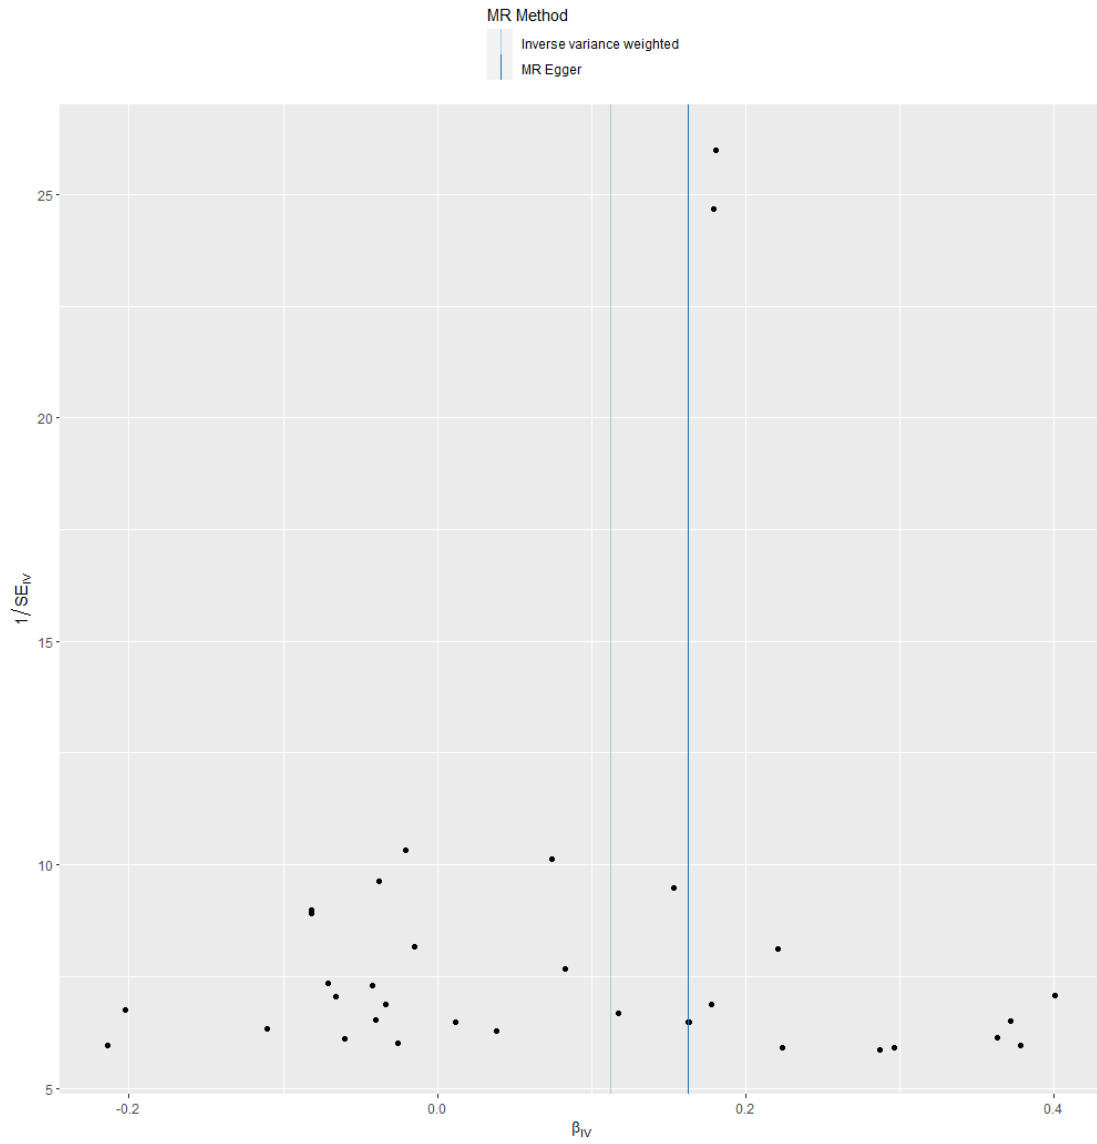

Figure S4B

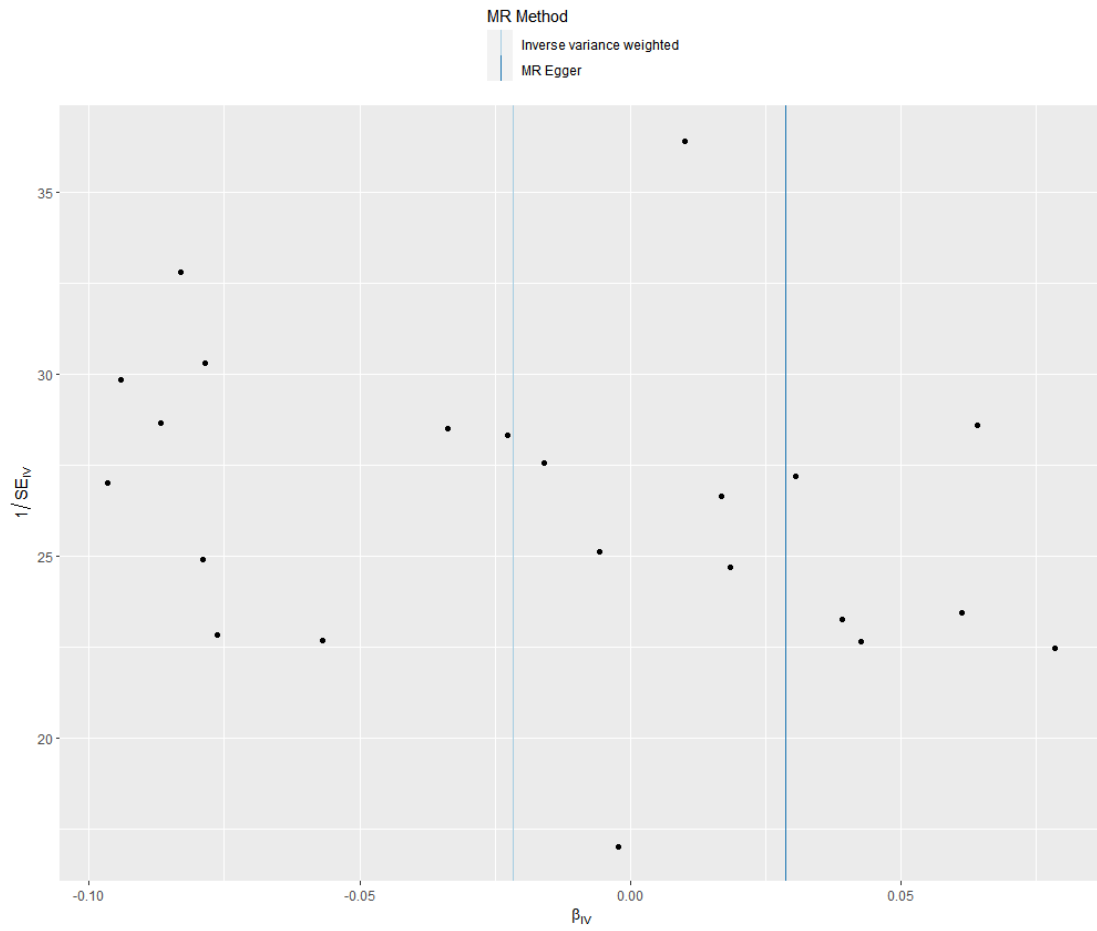

Figure S4C



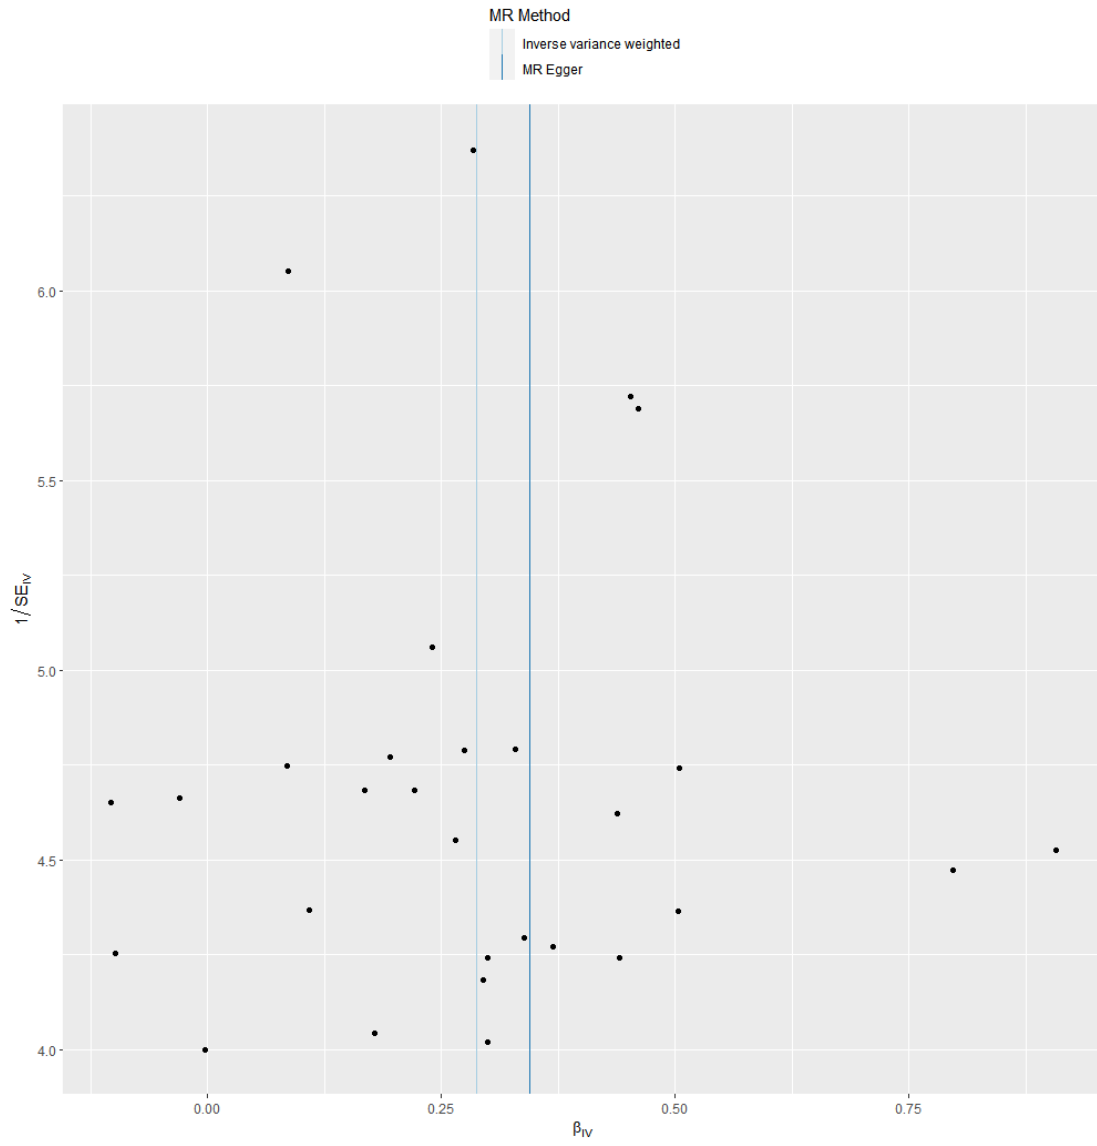

Figure S4D

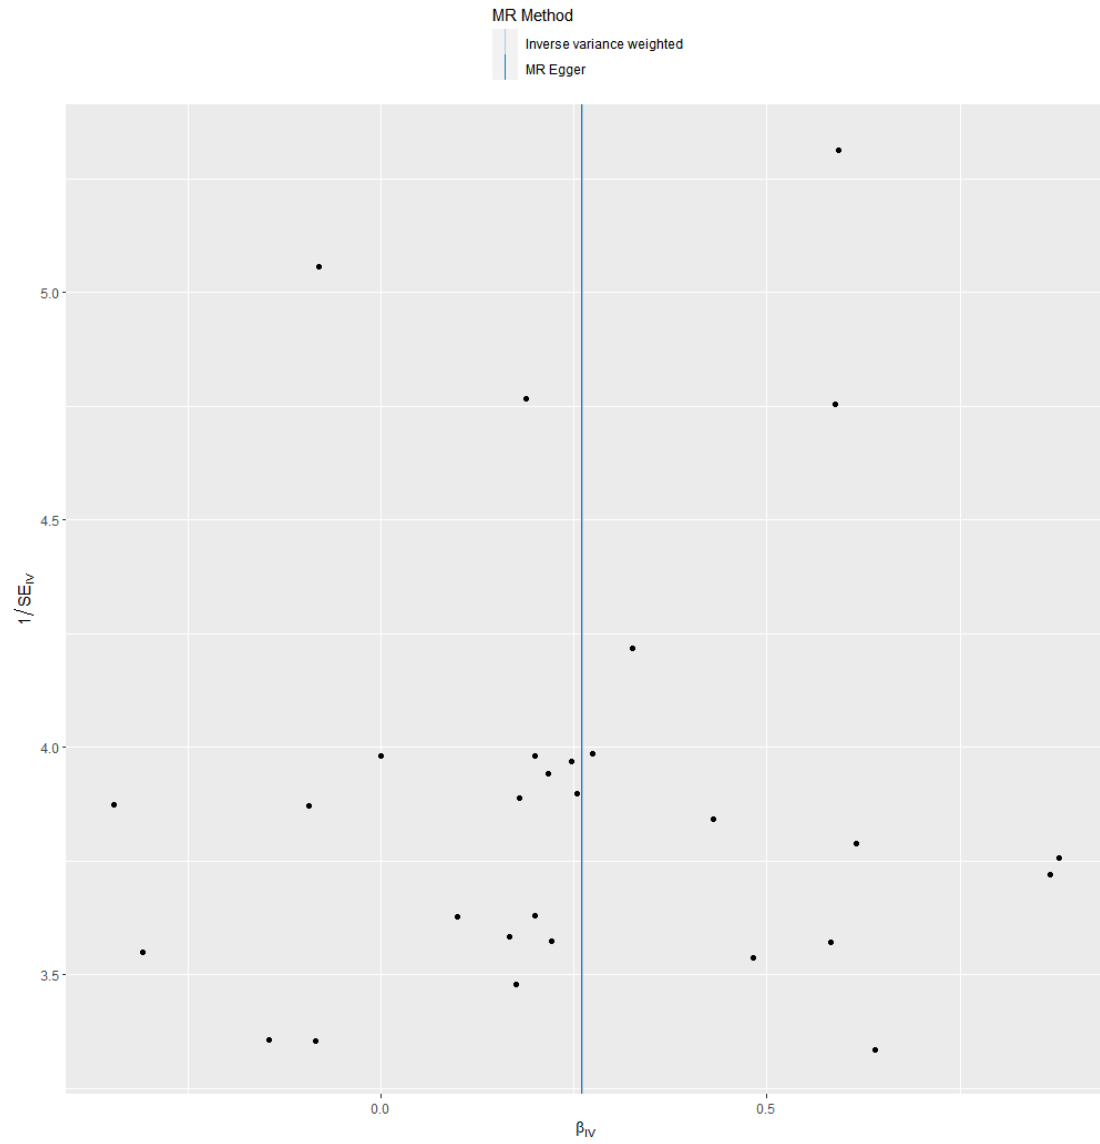

Figure S4E

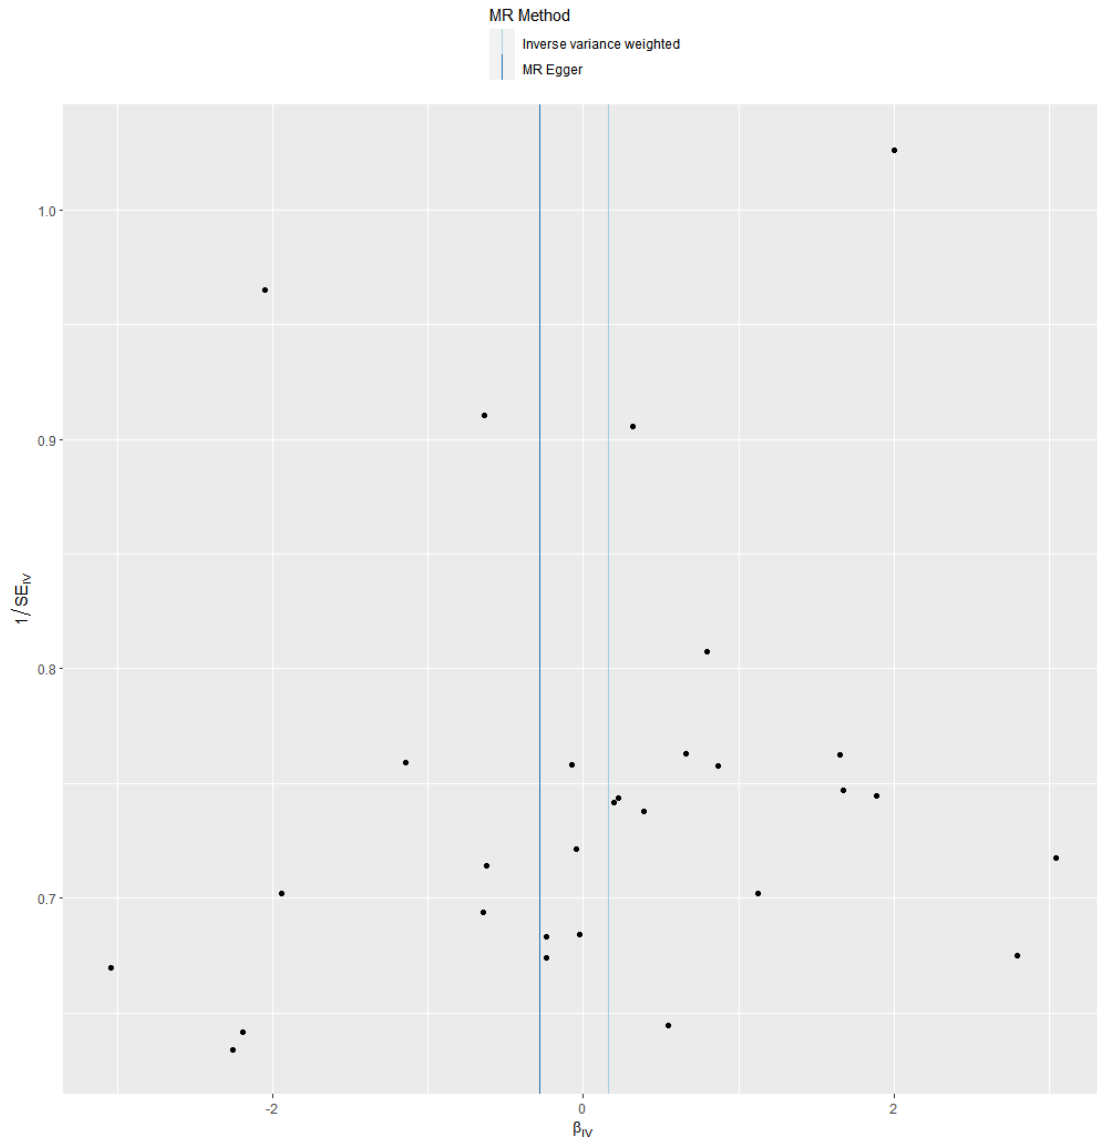

Figure S4F

Figure S4 Funnel plot to assess the robustness. Scattering points represented the effect estimated using a single SNP as an instrumental variable. The vertical lines denoted the overall estimate obtained by the inverse variance weighted estimate and the MR-Egger regression. A, The effect of hypertension on diabetes; B, The effect of diabetes on hypertension; C, The effect of hypertension on triglycerides; D, The effect of hypertension on stroke; E, The effect of hypertension on ischemic stroke; F, The effect of hypertension on intracranial hemorrhages.
